# Supplementary material
Source: PubMed Central journal article supplement (PMC10294012)
Supplement: jamapediatr-e231801-s002.pdf [file jamapediatr-e231801-s002.pdf]

## Data Sharing Statement

Miller. Characteristics Associated With Cannabis Use Initiation by Late Childhood and Early Adolescence in the Adolescent Brain Cognitive Development (ABCD) Study. *JAMA Pediatr.* Published June 26, 2023. doi:10.1001/jamapediatrics.2023.1801

### Data

**Data available:** Yes

**Data types:** Deidentified participant data, Data dictionary

**How to access data:** The ABCD data repository grows and changes over time. The ABCD Data repository and codebook are available via request from the NIH Data Archive (<https://nda.nih.gov/abcd/>). The ABCD data used in this report came from <https://dx.doi.org/10.15154/1523041>.

**When available:** With publication

### Supporting Documents

**Document types:** None

### Additional Information

**Who can access the data:** Qualified researchers can request access to ABCD shared data.

**Types of analyses:** Analyses detailed in access proposal and objectively and systematically reviewed the ABCD data access committee (DAC).

**Mechanisms of data availability:** Mechanisms for requesting access to ABCD shared data are detailed here: <https://nda.nih.gov/abcd/request-access.html>
